# Supplementary material for: Dolerite Fines Used as a Calcium Source for Microbially Induced Calcite Precipitation Reduce the Environmental Carbon Cost in Sandy Soil
Source: Front Microbiol. 2020 Sep 8;11:557119. doi: 10.3389/fmicb.2020.557119 (PMC7505998; doi:10.3389/fmicb.2020.557119)
Supplement: Supplementary file 2 [file Data_Sheet_2.XLSX]

## Sheet: Sheet1
Parameter	Unit	Value
Sand	wt %	96.2
Fines	wt %	3.8
D60	mm	0.18
D30	mm	0.1
D10	mm	0.07
Cu = D60/D30	-	2.57
Cc = (D30)2/(D60 D10)	-	0.79
pH	-	6.4
TIC	wt %	0.0003
TOC	wt %	0.0211
TN	wt %	0.0017
C/N	-	12.9
δ13CTIC	‰, relative to VPDB	-13.9
δ13CTOC	‰, relative to VPDB	-25.7
