# Supplementary material for: Dolerite Fines Used as a Calcium Source for Microbially Induced Calcite Precipitation Reduce the Environmental Carbon Cost in Sandy Soil
Source: Front Microbiol. 2020 Sep 8;11:557119. doi: 10.3389/fmicb.2020.557119 (PMC7505998; doi:10.3389/fmicb.2020.557119)
Supplement: Supplementary file 3 [file Data_Sheet_3.XLSX]

## Sheet: Sheet1
Chemical compound	TOC (wt %)	δ13Corg. (‰, relative to VPDB)
Sodium Acetate (SA)	28.6±0.3	-30.49±0.27
Molasses (MLS)	31.9±0.2	-12.58±0.07
Urea	20.1±0.2	-41.03±0.12
